# Supplementary material
Source: ML conference proceedings conference paper supplement (https://proceedings.mlr.press/v80/sun18b.html)
Supplement: Supplementary file [file sun18b-supp.pdf]

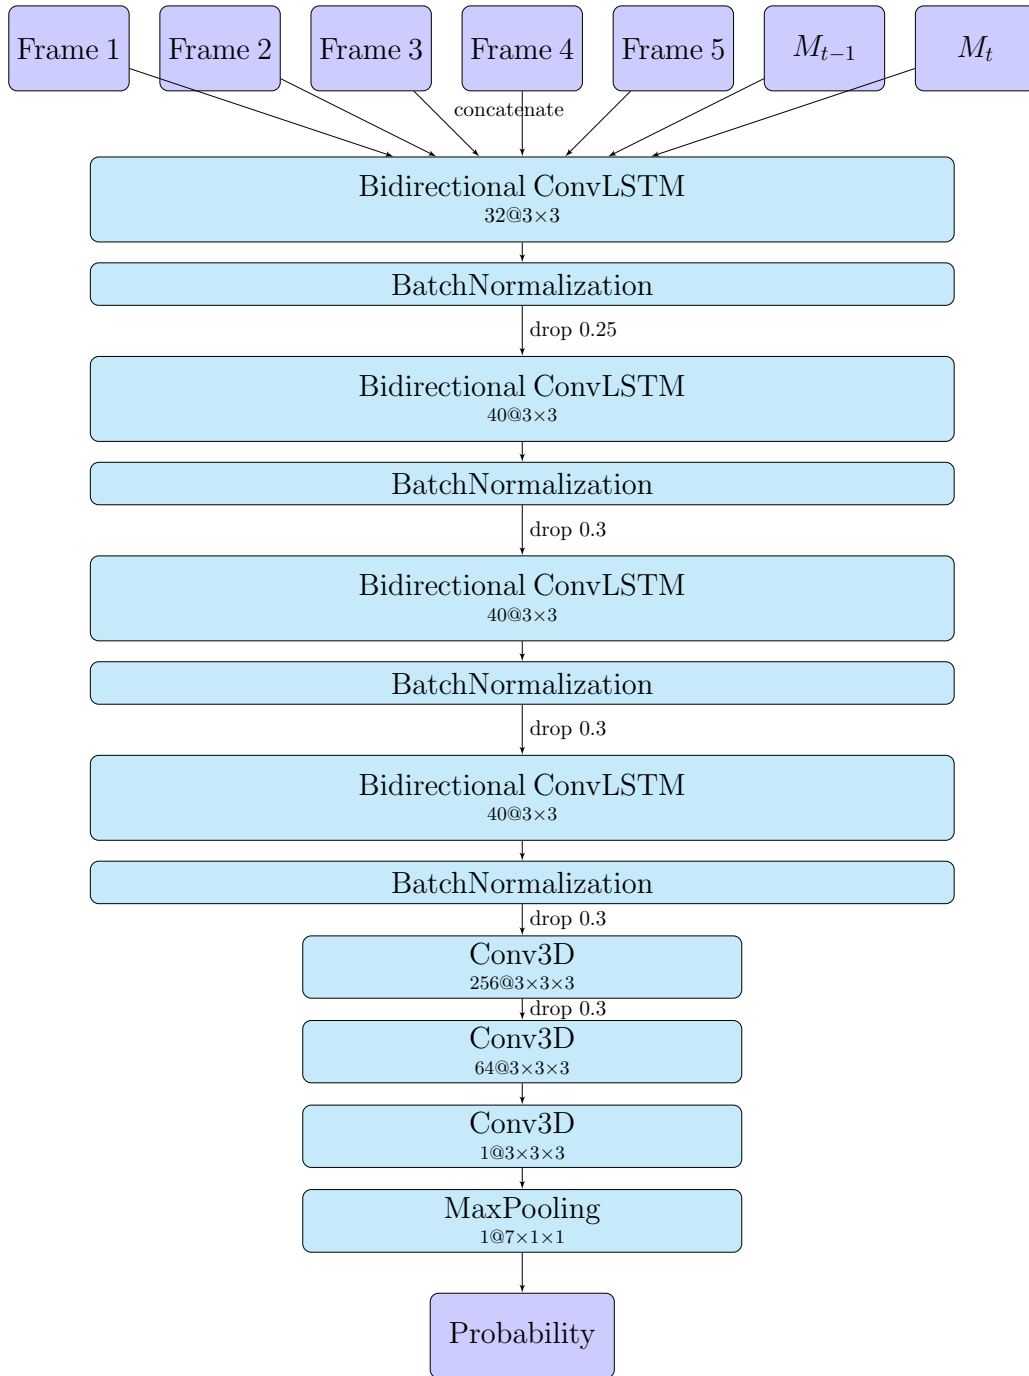

**Figure 5. Neural network architecture.** This is the architecture of the conditional transition density network described in section 4.2. We use Bidirectional Convolution LSTM and Convolution 3D Neural Networks as building blocks with notation '40@3x3' meaning 40 feature maps with kernel size 3 by 3. The input size of the networks is  $7 \times patch\_size \times patch\_size$ : 5 patches for  $Y_{t-2:t+2}$ , plus binary masks  $M_{t-1}$  and  $M_t$  encoding the positions of the particles at times  $t-1$  and  $t$  respectively. The output probability map is  $patch\_size \times patch\_size$ . We used  $patch\_size = 28$  here. The new birth network in section 4.3 uses a similar architecture.
